# Supplementary material for: Synthesis, Photophysics, and Solvatochromic Studies of an Aggregated-Induced-Emission Luminogen Useful in Bioimaging
Source: PubMed Central journal article supplement (PMC6891498; doi:10.3390/s19224932), 2019-11-12
Supplement: sensors-19-04932-s001.pdf [file sensors-19-04932-s001.pdf]

Supporting Materials

# Synthesis, Photophysics, and Solvatochromic Studies of an Aggregated-Induced-Emission Luminogen Useful in Bioimaging

Laura Espinar-Barranco <sup>1</sup>, Marta Meazza <sup>2</sup>, Azahara Linares-Perez <sup>3</sup>, Ramon Rios <sup>2</sup>, Jose Manuel Paredes <sup>1,\*</sup> and Luis Crovetto <sup>1,\*</sup>

- <sup>1</sup> Department of Physical Chemistry, University of Granada, Unidad de Excelencia en Química Aplicada a Biomedicina y Medioambiente (UEQ), Cartuja Campus, 18071 Granada, Spain; [lauraebe@correo.ugr.es](mailto:lauraebe@correo.ugr.es)
  - <sup>2</sup> School of Chemistry, University of Southampton, Highfield Campus, Southampton SO17 1BJ, UK; [M.Meazza@soton.ac.uk](mailto:M.Meazza@soton.ac.uk) (M.M.); [R.Rios-Torres@southampton.ac.uk](mailto:R.Rios-Torres@southampton.ac.uk) (R.R.)
  - <sup>3</sup> Department of Biochemistry and Molecular Biology II, Faculty of Pharmacy, University of Granada, Cartuja Campus, 18071 Granada, Spain; [azaharalinares@ugr.es](mailto:azaharalinares@ugr.es)
- \* Correspondence: [jmparedes@ugr.es](mailto:jmparedes@ugr.es) (J.M.P.); [luiscrovetto@ugr.es](mailto:luiscrovetto@ugr.es) (L.C.)

Received: 10 October 2019; Accepted: 7 November 2019; Published: 12 November 2019

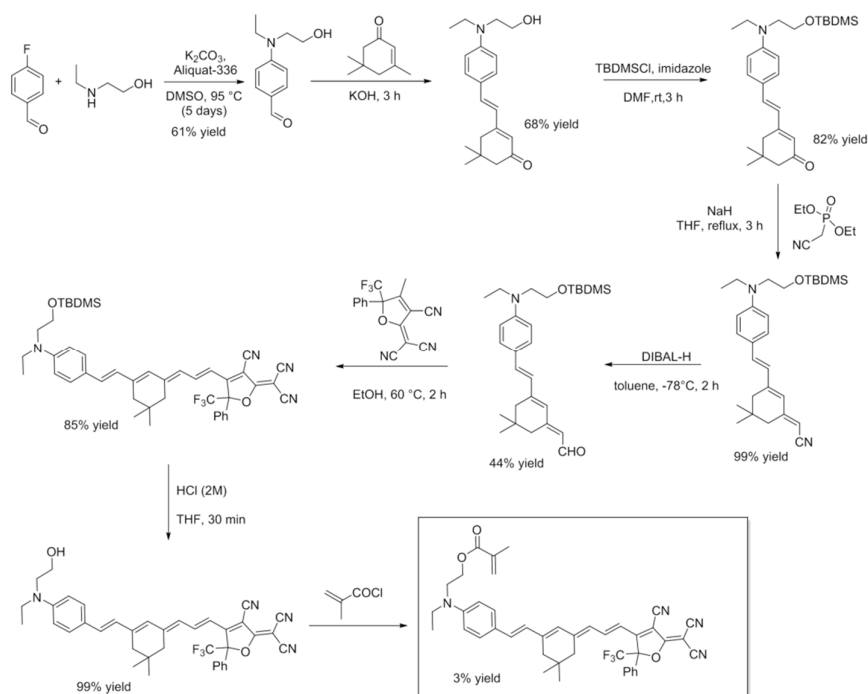

**Scheme S1.** Synthesis of dye: 2-((4-((E)-2-((E)-3-((E)-3-(4-cyano-5-(dicyanomethylene)-2-phenyl-2-(trifluoromethyl)-2,5-dihydrofuran-3-yl)allylidene)-5,5-dimethylcyclohex-1-en-1-yl)vinyl)phenyl)(ethyl)amino)ethyl methacrylate.

## Quantum Yield calculation

The relative fluorescence quantum yield values were determined using the following formula [1]:

$$\Phi = \Phi_R \cdot \frac{I}{I_R} \cdot \frac{OD_R}{OD} \cdot \frac{n^2}{n_R^2}$$

where  $\Phi$  and  $\Phi_R$  denote the fluorescence quantum yield of the sample and the reference, respectively,  $I$  and  $I_R$  the integrated fluorescence spectra of the sample and the reference,  $OD$  and  $OD_R$  the absorption at the excitation wavelength of the sample and the reference and  $n$  and  $n_R$  the refractive index of the solvent where the sample and reference are dissolved. As references, we have used Nile Blue A in EtOH ( $\Phi = 0.27$ ) [2]. The samples were excited at the maximum absorption of each solvent.

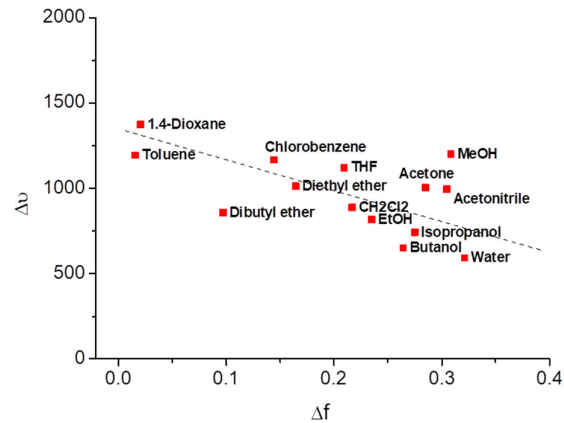

**Figure S1.** Lippert–Mataga representation of orientation polarizability of PEMC dissolved in different solvents.

### Lippert–Mataga equation

$$\bar{\nu}_A - \bar{\nu}_F = \frac{2}{hc} \left( \frac{\varepsilon - 1}{2\varepsilon + 1} - \frac{n^2 - 1}{2n^2 + 1} \right) \frac{(\mu_E - \mu_G)^2}{a^3} + k$$

In the Lippert–Mataga equation,  $h$  is the Planck constant,  $c$  represents the light speed in vacuum,  $a$  is the radius of the cavity where the dye is allocated,  $\bar{\nu}_A$  and  $\bar{\nu}_F$  are the absorption and emission wavenumber, respectively, and  $k$  is a constant representing the difference between the absorption and emission wavenumbers in the vacuum.

$$\Delta f = \frac{\varepsilon - 1}{2\varepsilon + 1} - \frac{n^2 - 1}{2n^2 + 1}$$

Orientation polarizability ( $\Delta f$ ) is the combination of both parameters as indicated in the equation and is included in the Lippert–Mataga equation.

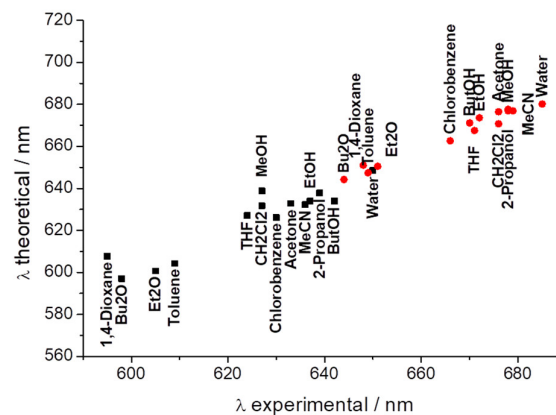

**Figure S2.** Experimental and theoretical wavelength (obtained from the Catalan approach data) of the 14 solvents used.

### Catalan equation

$$A = A_0 + b SA + c SB + d SP + e SdP$$

The analysis is based on four empirical solvent scales: polarizability (*SP*), dipolarity (*SdP*), acidity (*SA*), and basicity (*SB*), hence taking into account both general effects and specific hydrogen bonding features of the solvents.

Where *A* is a solvent-dependent physicochemical property in a specific solvent, *A*<sub>0</sub> is the statistical quantity corresponding to the value of the property in the gas phase and *b* to *e* are the regression coefficients describing the sensitivity of property *A* to the different solute-solvent interactions.

**Table S1.** Estimated coefficients ± standard errors and correlation coefficient (*r*) for the multilinear regression analyses of  $\tilde{\nu}_{abs}$  and  $\tilde{\nu}_{em}$ . The estimates are expressed in cm<sup>-1</sup>.

|                     | <i>A</i> <sub>0</sub> | <i>b</i> ( <i>SA</i> ) | <i>c</i> ( <i>SB</i> ) | <i>d</i> ( <i>SP</i> ) | <i>e</i> ( <i>SdP</i> ) | <i>r</i>   |
|---------------------|-----------------------|------------------------|------------------------|------------------------|-------------------------|------------|
| $\tilde{\nu}_{abs}$ | 19501 ± 970           | -401 ± 180             | -606 ± 271             | -3125 ± 1157           | -1518 ± 240             | 0.94<br>20 |
|                     | 18803 ± 1071          |                        | -357 ± 288             | -2213 ± 1262           | -1724 ± 258             | 0.91<br>19 |
|                     | 17819 ± 717           | -235 ± 191             |                        | -1266 ± 941            | -1367 ± 269             | 0.91<br>16 |
|                     | 16919 ± 207           | -229 ± 211             | -81 ± 237              |                        | -1274 ± 278             | 0.89<br>74 |
| $\tilde{\nu}_{abs}$ | 16484 ± 1804          | -840 ± 354             | -123 ± 555             | -365 ± 2288            |                         | 0.66<br>02 |
|                     | 16945 ± 153           |                        |                        |                        | -1451 ± 211             | 0.88<br>56 |
|                     | 15013 ± 1312          |                        |                        | 1384 ± 1898            |                         | 0.19<br>83 |
|                     | 15840 ± 229           |                        | 297 ± 460              |                        |                         | 0.17<br>62 |
|                     | 16169 ± 112           | -793 ±                 |                        |                        |                         | 0.65       |

|                    |              |            |            |             |             |      |
|--------------------|--------------|------------|------------|-------------|-------------|------|
|                    |              | 251        |            |             |             | 83   |
| $\tilde{\nu}_{em}$ | 16658 ± 432  | -89 ± 80   | -325 ± 121 | -1093 ± 515 | -1112 ± 107 | 0.97 |
|                    |              |            |            |             |             | 36   |
|                    | 16504 ± 413  |            | -269 ± 111 | -891 ± 487  | -1158 ± 99  | 0.97 |
|                    |              |            |            |             |             | 03   |
|                    | 15758 ± 342  | 0 ± 91     |            | -98 ± 449   | -1031 ± 128 | 0.95 |
|                    |              |            |            |             |             | 40   |
|                    | 15755 ± 84   | -29 ± 86   | -141 ± 96  |             | -1027 ± 113 | 0.96 |
|                    |              |            |            |             |             | 15   |
|                    | 14448 ± 1236 | -410 ± 243 | 30 ± 380   | 930 ± 1567  |             | 0.61 |
|                    |              |            |            |             |             | 75   |
|                    | 15685 ± 65   |            |            |             | -1022 ± 89  | 0.95 |
|                    |              |            |            |             |             | 38   |
|                    | 13901 ± 821  |            |            | 1590 ± 1188 |             | 0.34 |
|                    |              |            |            |             |             | 80   |
|                    | 14955 ± 152  |            | 95 ± 305   |             |             | 0.08 |
|                    |              |            |            |             |             | 58   |
|                    | 15114 ± 79   | -466 ± 176 |            |             |             | 0.59 |
|                    |              |            |            |             |             | 15   |

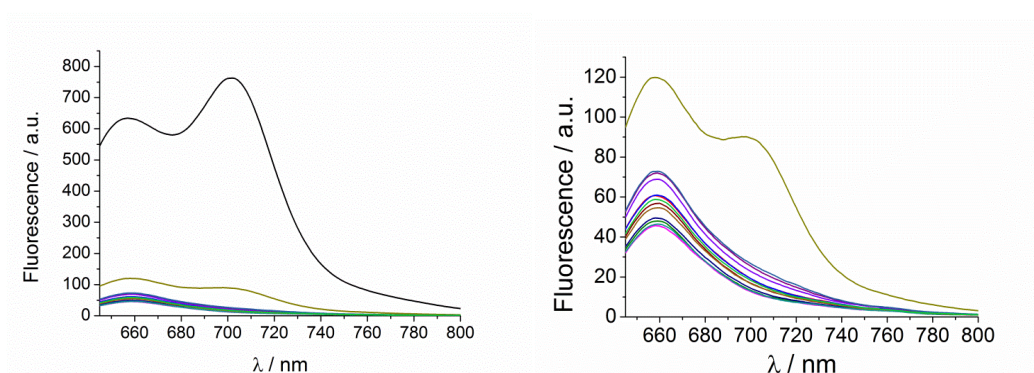

**Figure S3.** Fluorescence spectra in ethanol as solvent at different PEMC concentrations. (Top) Including  $5 \times 10^{-3}$  M (highest value) to see the AIE effect. (Bottom) Without  $5 \times 10^{-3}$  M to see in detail the Kavanagh law.

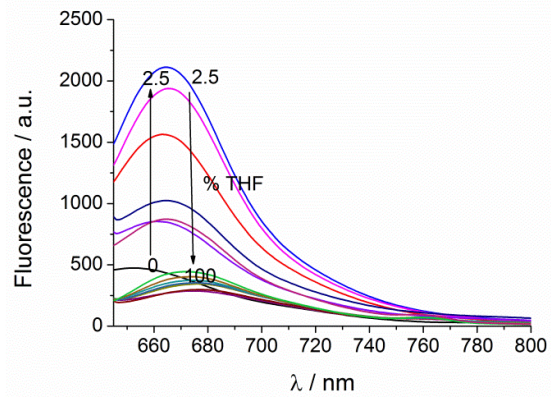

**Figure S4.** Fluorescence spectrum of PEMC in the presence of increasing proportions of THF to water.

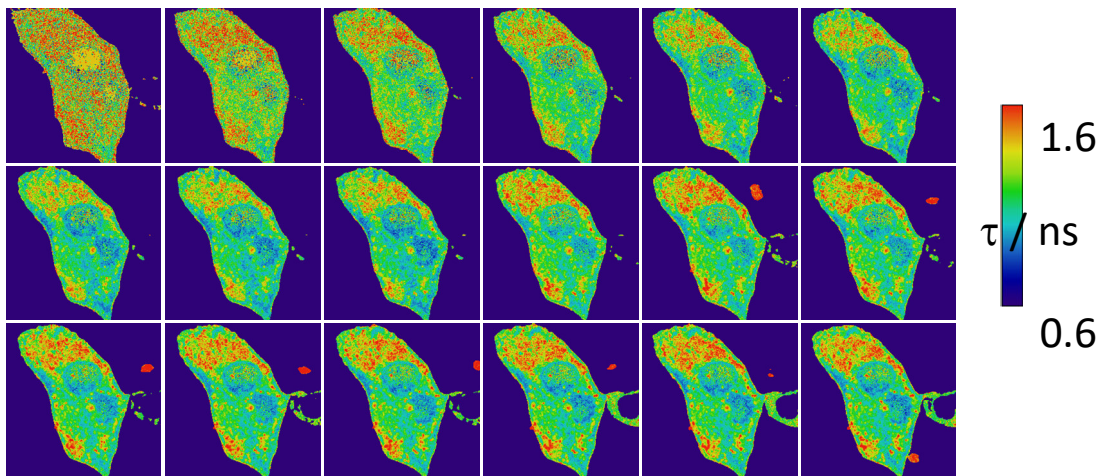

**Figure S5.** FLIM images of input kinetics of PEMC in MDA-MB-231 cells.

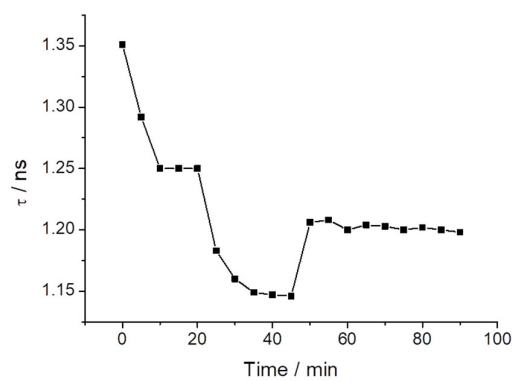

**Figure S6.** Fluorescence lifetimes recovered from the input kinetics of PEMC in MDA-MB-231 cells from Figure S3.

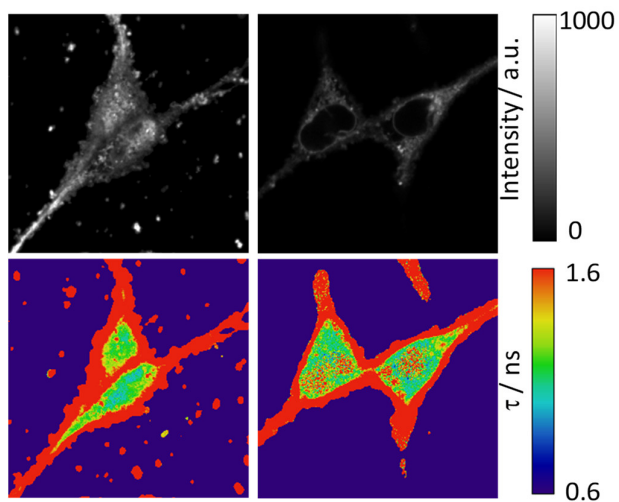

Figure S7. FLIM images of PEMC in HEK cells.

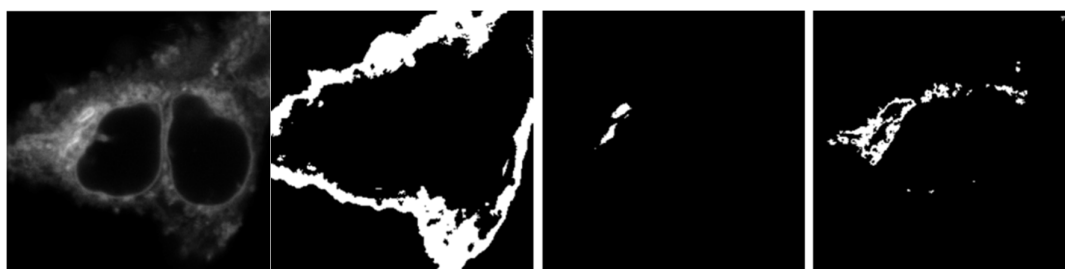

Figure S8. Intensity images of different organelles isolated by intensity threshold.

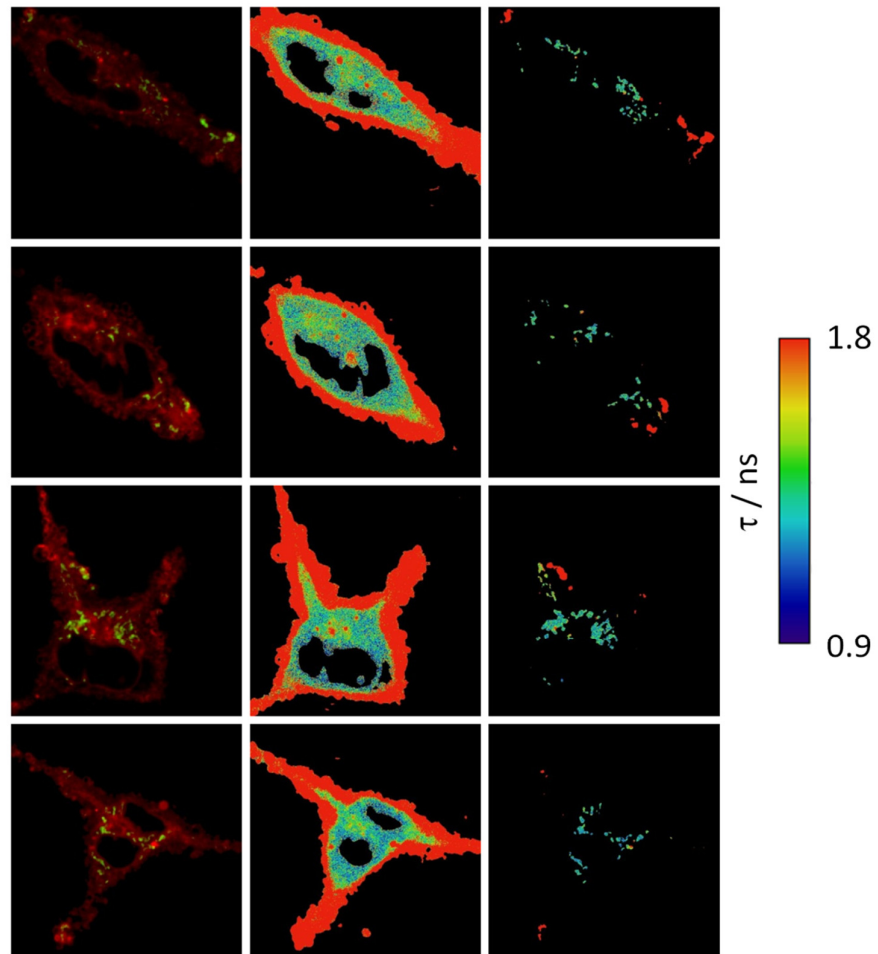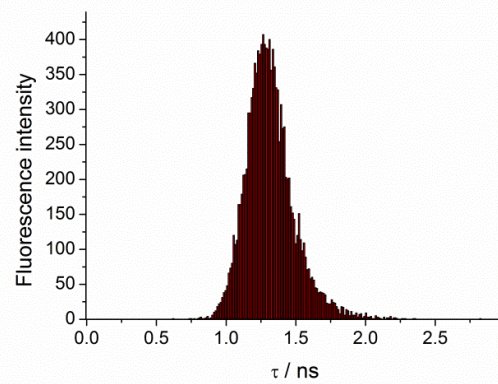

**Figure S9.** (Up) Fluorescence intensity images maps of HEK cells with MitoTracker Green and PEMC (**left**), fluorescence lifetime of PEMC separating the red signal (**in the middle**) and isolating the colocation region (**right**). (**Bottom**) Histograms of PEMC in the mitochondria region of the cells.

#### Reference

1. Lakowicz, J.R. *Principles of Fluorescence Spectroscopy*; 3rd ed.; Springer: New York, NY, USA, 2006.

2. Brouwer, A.M. Standards for photoluminescence quantum yield measurements in solution (IUPAC Technical Report). *Pure Appl. Chem.* **2011**, *83*, 2213–2228, doi:10.1351/pac-rep-10-09-31.
